# Supplementary material
Source: PubMed Central journal article supplement (PMC10841571)
Supplement: NIHMS1950672-supplement-Supplemental_material.pdf [file NIHMS1950672-supplement-Supplemental_material.pdf]

## **Online Appendices for:**

### **Racialized Health Inequities: Quantifying Socioeconomic and Stress Pathways Using Moderated Mediation**

Tyson H. Brown, Taylor W. Hargrove, Patricia Homan, and Daniel E. Adkins

#### **Appendix A. Supplemental Methods**

All SEMs were estimated using full information maximum likelihood estimation (i.e., FIML, direct maximum likelihood) to account for missing data. FIML has optimal properties in the presence of data that is missing at random (MAR) or missing completely at random (MCAR). Therefore, it is generally superior to listwise deletion (i.e., complete case analysis) (Rubin 2004), and exhibits equally optimal properties to multiple imputation with asymptotic imputations (von Hippel 2018). All SEMs were fit using survey weights (i.e., sampling weights) to adjust for disproportionate sampling probabilities. These weights are equal to the inverse of the probability of the subject being sampled and are recommended for use with this HRS dataset (Korn 1991). Sampling weights were applied using Stata 16.1's "pweights" (i.e., "[pw=hrs\_wts]").

Generalized Huber/White/sandwich cluster robust variance estimates (i.e., cluster robust standard errors (SEs)) were used to adjust statistical inferences to account for clustering of observations within subjects as well as sampling weighting (Shaun 2011). Because likelihood estimates are not produced in the estimation of survey weighted SEMs, it is not possible to use likelihood based fit indices (or nested LRTs) to assess model fit for these models. All analyses were conducted on pooled data from two waves of data collection; thus, all equations in all models adjust for a (fixed) dichotomous wave indicator. All analyses were conducted using Stata 16.1.

In order to specify a control covariate measuring relevant medication use, we accessed medication information on HRS participants for six (related) classes of metabolic syndrome-related medications. Specifically, we included pharmacotherapies for: (a) blood pressure, (b) diabetes (oral administration), (c) insulin (shots or pump), (d) heart (e.g., myocardial infarction treatment), (e) stroke, (f) cholesterol. These medication data were collected in four waves of repeated assessments in the HRS: 2006, 2008, 2010, and 2012, which correspond to the two waves we include in the main analysis (i.e., 2006-2008 corresponds to our analysis wave 1, and 2010-2012 corresponds to our analysis wave 2). For each of our two analysis waves, we specified two versions of the medication covariate: (1) a count of the number of metabolic syndrome-related drug classes that the respondent took over the preceding two-year period, and (2) a dichotomous indicator whether the respondent took any of the assayed metabolic syndrome-related medications over the preceding two year period. We then individually tested both of these medication specifications as control covariates in the main model sequence for cumulative biological risk. The dichotomous indicator was significantly more predictive, suggesting less measurement error; thus, we retained the dichotomous indicator for the final reported analyses. Finally, based on the significant effects of the medication indicator in models predicting cumulative biological risk measure, and compelling arguments suggesting that they may be relevant, we also tested the medication indicator in the models for the other outcomes, and found it strongly predictive for those outcomes as well. Thus, we opted to include the medication indicator as a control covariate for all three outcomes in the final reported analyses.

We used the Stata post-estimation command *estat teffects* to calculate direct, indirect, and total effects for all estimated models. This command reports these effects for each path, following Sobel (1987) and Bollen (1989)<sup>2</sup>, along with standard errors obtained by the delta

method. All effects are standardized and therefore interpreted as the expected SD change in the outcome, given one SD change in the predictor. Thus, the effect decompositions for the simple serial mediation model shown in Figure 1, Panel A are:

$$Full\ direct = p_1 \quad Eq. 1$$

$$Full\ indirect = \sum (p_{2j} \times p_{4l}) + \sum (p_{3k} \times p_{6n}) + \sum (p_{2j} \times p_{5m} \times p_{6n}) \quad Eq. 2$$

$$Total\ effect = Full\ direct + Full\ indirect \quad Eq. 3$$

$$Percent\ Indirect = \frac{Full\ indirect}{Total\ effect} \quad Eq. 4$$

We also used Stata's *estat teffects* routine to derive indirect and total effect estimates for the moderated mediation models. By coding the moderation effects as White\*mediator, we were able to estimate the effect decompositions using the formulae above (Eq 1-4).

## Appendix B. Full Results from Simple Mediation and Moderated Mediation Models

### Appendix Table B1. Black-White Simple Mediation Models

| Equation outcome                     | <u>Self-rated health</u> |         | <u>Cum Bio Risk</u> |         | <u>Func Limitations</u> |         |
|--------------------------------------|--------------------------|---------|---------------------|---------|-------------------------|---------|
|                                      | $\beta$                  | SE      | $\beta$             | SE      | $\beta$                 | SE      |
| <b><u>Primary health outcome</u></b> |                          |         |                     |         |                         |         |
| Education                            | 0.19***                  | (0.010) | -0.10***            | (0.011) | -0.15***                | (0.010) |
| Income                               | 0.12***                  | (0.011) | -0.02*              | (0.011) | -0.08***                | (0.011) |
| Wealth                               | 0.08***                  | (0.011) | -0.06***            | (0.011) | -0.09***                | (0.012) |
| Discrim (daily)                      | -0.03**                  | (0.011) | 0.00                | (0.011) | 0.04***                 | (0.011) |
| Discrim (2+ att)                     | -0.05***                 | (0.009) | 0.09***             | (0.011) | 0.07***                 | (0.010) |
| Discrim (Major)                      | 0.01                     | (0.009) | 0.02                | (0.011) | 0.02*                   | (0.010) |
| Chr. Stressors                       | -0.11***                 | (0.010) | 0.03**              | (0.010) | 0.09***                 | (0.009) |
| Trauma                               | -0.10***                 | (0.009) | 0.04***             | (0.011) | 0.10***                 | (0.010) |
| Financial Strain                     | -0.10***                 | (0.011) | 0.06***             | (0.011) | 0.09***                 | (0.011) |
| Disorder                             | -0.04**                  | (0.012) | 0.01                | (0.013) | 0.04**                  | (0.012) |
| Mistrust                             | -0.06***                 | (0.012) | 0.01                | (0.013) | 0.03*                   | (0.012) |
| Black                                | -0.03*                   | (0.011) | 0.07***             | (0.013) | -0.01                   | (0.013) |
| Age                                  | -0.09***                 | (0.017) | -0.01               | (0.019) | 0.12***                 | (0.018) |
| Female                               | 0.03***                  | (0.009) | 0.03**              | (0.010) | 0.12***                 | (0.009) |
| Married                              | -0.00                    | (0.010) | 0.01                | (0.011) | 0.02                    | (0.010) |
| Insurance                            | 0.04***                  | (0.010) | 0.02                | (0.010) | -0.08***                | (0.010) |
| Cohort                               | -0.01                    | (0.020) | -0.05*              | (0.022) | -0.02                   | (0.020) |
| Wave                                 | -0.01                    | (0.008) | -0.03***            | (0.007) | -0.00                   | (0.007) |
| Pharmacotherapy                      | -0.09***                 | (0.011) | 0.17***             | (0.010) | 0.05***                 | (0.010) |
| <b><u>Education</u></b>              |                          |         |                     |         |                         |         |
| Black                                | -0.17***                 | (0.012) | -0.17***            | (0.012) | -0.17***                | (0.012) |
| Age                                  | -0.07***                 | (0.020) | -0.07***            | (0.020) | -0.07***                | (0.020) |
| Female                               | -0.01                    | (0.010) | -0.01               | (0.010) | -0.01                   | (0.010) |
| Married                              | 0.03**                   | (0.011) | 0.03**              | (0.011) | 0.03**                  | (0.011) |
| Insurance                            | 0.20***                  | (0.011) | 0.20***             | (0.011) | 0.20***                 | (0.011) |
| Cohort                               | 0.05*                    | (0.023) | 0.05*               | (0.023) | 0.05*                   | (0.023) |
| Wave                                 | -0.05***                 | (0.005) | -0.05***            | (0.005) | -0.05***                | (0.005) |
| <b><u>Income</u></b>                 |                          |         |                     |         |                         |         |
| Black                                | -0.20***                 | (0.014) | -0.20***            | (0.014) | -0.20***                | (0.014) |
| Age                                  | -0.01                    | (0.016) | -0.01               | (0.016) | -0.01                   | (0.016) |
| Female                               | -0.02                    | (0.009) | -0.02               | (0.009) | -0.02                   | (0.009) |
| Married                              | 0.34***                  | (0.011) | 0.34***             | (0.011) | 0.34***                 | (0.011) |
| Insurance                            | 0.27***                  | (0.011) | 0.27***             | (0.011) | 0.27***                 | (0.011) |
| Cohort                               | 0.02                     | (0.018) | 0.02                | (0.018) | 0.02                    | (0.018) |
| Wave                                 | -0.05***                 | (0.009) | -0.05***            | (0.009) | -0.05***                | (0.009) |
| <b><u>Wealth</u></b>                 |                          |         |                     |         |                         |         |
| Black                                | -0.23***                 | (0.015) | -0.23***            | (0.015) | -0.23***                | (0.015) |
| Age                                  | 0.11***                  | (0.019) | 0.11***             | (0.019) | 0.11***                 | (0.019) |
| Female                               | -0.00                    | (0.010) | -0.00               | (0.010) | -0.00                   | (0.010) |
| Married                              | 0.19***                  | (0.012) | 0.19***             | (0.012) | 0.19***                 | (0.012) |
| Insurance                            | 0.18***                  | (0.011) | 0.18***             | (0.011) | 0.18***                 | (0.011) |
| Cohort                               | -0.11***                 | (0.023) | -0.11***            | (0.023) | -0.11***                | (0.023) |
| Wave                                 | 0.00                     | (0.008) | 0.00                | (0.008) | 0.00                    | (0.008) |
| <b><u>Discrim (daily)</u></b>        |                          |         |                     |         |                         |         |
| Education                            | -0.05***                 | (0.012) | -0.05***            | (0.012) | -0.05***                | (0.012) |

|           |          |         |          |         |          |         |
|-----------|----------|---------|----------|---------|----------|---------|
| Income    | -0.01    | (0.011) | -0.01    | (0.011) | -0.01    | (0.011) |
| Wealth    | -0.09*** | (0.013) | -0.09*** | (0.013) | -0.09*** | (0.013) |
| Black     | 0.04**   | (0.015) | 0.04**   | (0.015) | 0.04**   | (0.015) |
| Age       | -0.16*** | (0.020) | -0.16*** | (0.020) | -0.16*** | (0.020) |
| Female    | -0.10*** | (0.011) | -0.10*** | (0.011) | -0.10*** | (0.011) |
| Married   | -0.06*** | (0.012) | -0.06*** | (0.012) | -0.06*** | (0.012) |
| Insurance | -0.02*   | (0.011) | -0.02*   | (0.011) | -0.02*   | (0.011) |
| Cohort    | 0.04     | (0.023) | 0.04     | (0.023) | 0.04     | (0.023) |
| Wave      | 0.05***  | (0.009) | 0.05***  | (0.009) | 0.05***  | (0.009) |

**Discrim (2+ att)**

|           |          |         |          |         |          |         |
|-----------|----------|---------|----------|---------|----------|---------|
| Education | 0.01     | (0.011) | 0.01     | (0.011) | 0.01     | (0.011) |
| Income    | -0.04*** | (0.011) | -0.04*** | (0.011) | -0.04*** | (0.011) |
| Wealth    | -0.09*** | (0.012) | -0.09*** | (0.012) | -0.09*** | (0.012) |
| Black     | 0.14***  | (0.013) | 0.14***  | (0.013) | 0.14***  | (0.013) |
| Age       | -0.07*** | (0.018) | -0.07*** | (0.018) | -0.07*** | (0.018) |
| Female    | 0.04***  | (0.010) | 0.04***  | (0.010) | 0.04***  | (0.010) |
| Married   | -0.04*** | (0.011) | -0.04*** | (0.011) | -0.04*** | (0.011) |
| Insurance | -0.01    | (0.010) | -0.01    | (0.010) | -0.01    | (0.010) |
| Cohort    | 0.02     | (0.021) | 0.02     | (0.021) | 0.02     | (0.021) |
| Wave      | -0.05*** | (0.009) | -0.05*** | (0.009) | -0.05*** | (0.009) |

**Discrim (Major)**

|           |          |         |          |         |          |         |
|-----------|----------|---------|----------|---------|----------|---------|
| Education | 0.09***  | (0.011) | 0.09***  | (0.011) | 0.09***  | (0.011) |
| Black     | 0.14***  | (0.016) | 0.14***  | (0.016) | 0.14***  | (0.016) |
| Age       | -0.15*** | (0.018) | -0.15*** | (0.018) | -0.15*** | (0.018) |
| Female    | -0.09*** | (0.011) | -0.09*** | (0.011) | -0.09*** | (0.011) |
| Married   | -0.07*** | (0.011) | -0.07*** | (0.011) | -0.07*** | (0.011) |
| Insurance | -0.10*** | (0.012) | -0.10*** | (0.012) | -0.10*** | (0.012) |
| Cohort    | 0.04     | (0.022) | 0.04     | (0.022) | 0.04     | (0.022) |
| Wave      | 0.00     | (0.009) | 0.00     | (0.009) | 0.00     | (0.009) |

**Chr. Stressors**

|           |          |         |          |         |          |         |
|-----------|----------|---------|----------|---------|----------|---------|
| Education | -0.04*** | (0.010) | -0.04*** | (0.010) | -0.04*** | (0.010) |
| Income    | -0.04*** | (0.011) | -0.04*** | (0.011) | -0.04*** | (0.011) |
| Wealth    | -0.14*** | (0.011) | -0.14*** | (0.011) | -0.14*** | (0.011) |
| Black     | 0.06***  | (0.012) | 0.06***  | (0.012) | 0.06***  | (0.012) |
| Age       | -0.13*** | (0.019) | -0.13*** | (0.019) | -0.13*** | (0.019) |
| Female    | 0.03**   | (0.010) | 0.03**   | (0.010) | 0.03**   | (0.010) |
| Married   | 0.02*    | (0.011) | 0.02*    | (0.011) | 0.02*    | (0.011) |
| Insurance | -0.06*** | (0.010) | -0.06*** | (0.010) | -0.06*** | (0.010) |
| Cohort    | 0.05*    | (0.023) | 0.05*    | (0.023) | 0.05*    | (0.023) |
| Wave      | -0.07*** | (0.008) | -0.07*** | (0.008) | -0.07*** | (0.008) |

**Trauma**

|           |          |         |          |         |          |         |
|-----------|----------|---------|----------|---------|----------|---------|
| Education | 0.01     | (0.011) | 0.01     | (0.011) | 0.01     | (0.011) |
| Black     | 0.01     | (0.013) | 0.01     | (0.013) | 0.01     | (0.013) |
| Age       | 0.03     | (0.020) | 0.03     | (0.020) | 0.03     | (0.020) |
| Female    | -0.01    | (0.011) | -0.01    | (0.011) | -0.01    | (0.011) |
| Married   | -0.05*** | (0.011) | -0.05*** | (0.011) | -0.05*** | (0.011) |
| Insurance | -0.10*** | (0.011) | -0.10*** | (0.011) | -0.10*** | (0.011) |
| Cohort    | -0.02    | (0.023) | -0.02    | (0.023) | -0.02    | (0.023) |
| Wave      | 0.04***  | (0.008) | 0.04***  | (0.008) | 0.04***  | (0.008) |

**Financial Strain**

|           |          |         |          |         |          |         |
|-----------|----------|---------|----------|---------|----------|---------|
| Education | -0.08*** | (0.011) | -0.08*** | (0.011) | -0.08*** | (0.011) |
| Income    | -0.13*** | (0.013) | -0.13*** | (0.013) | -0.13*** | (0.013) |
| Wealth    | -0.27*** | (0.011) | -0.27*** | (0.011) | -0.27*** | (0.011) |
| Black     | 0.02*    | (0.012) | 0.02     | (0.012) | 0.02*    | (0.012) |

|                        |          |         |          |         |          |         |
|------------------------|----------|---------|----------|---------|----------|---------|
| Age                    | -0.17*** | (0.017) | -0.17*** | (0.017) | -0.17*** | (0.017) |
| Female                 | 0.03***  | (0.009) | 0.03***  | (0.009) | 0.03***  | (0.009) |
| Married                | -0.00    | (0.011) | -0.00    | (0.011) | -0.00    | (0.011) |
| Insurance              | -0.12*** | (0.010) | -0.12*** | (0.010) | -0.12*** | (0.010) |
| Cohort                 | 0.09***  | (0.020) | 0.09***  | (0.020) | 0.09***  | (0.020) |
| Wave                   | 0.02*    | (0.008) | 0.02*    | (0.008) | 0.02*    | (0.008) |
| <b><u>Disorder</u></b> |          |         |          |         |          |         |
| Education              | -0.13*** | (0.010) | -0.13*** | (0.010) | -0.13*** | (0.010) |
| Income                 | -0.05*** | (0.012) | -0.05*** | (0.012) | -0.05*** | (0.012) |
| Wealth                 | -0.11*** | (0.011) | -0.11*** | (0.011) | -0.11*** | (0.011) |
| Black                  | 0.20***  | (0.013) | 0.20***  | (0.013) | 0.20***  | (0.013) |
| Age                    | -0.03    | (0.017) | -0.03    | (0.017) | -0.03    | (0.017) |
| Female                 | -0.01    | (0.009) | -0.01    | (0.009) | -0.01    | (0.009) |
| Married                | -0.03**  | (0.011) | -0.03**  | (0.011) | -0.03**  | (0.011) |
| Insurance              | -0.05*** | (0.010) | -0.05*** | (0.010) | -0.05*** | (0.010) |
| Cohort                 | 0.04     | (0.020) | 0.04     | (0.020) | 0.04     | (0.020) |
| Wave                   | -0.02*   | (0.008) | -0.02*   | (0.008) | -0.02*   | (0.008) |
| <b><u>Mistrust</u></b> |          |         |          |         |          |         |
| Education              | -0.07*** | (0.011) | -0.07*** | (0.011) | -0.07*** | (0.011) |
| Income                 | -0.04*** | (0.012) | -0.04*** | (0.012) | -0.04*** | (0.012) |
| Wealth                 | -0.12*** | (0.011) | -0.12*** | (0.011) | -0.12*** | (0.011) |
| Black                  | 0.17***  | (0.013) | 0.16***  | (0.013) | 0.16***  | (0.013) |
| Age                    | -0.09*** | (0.018) | -0.09*** | (0.018) | -0.09*** | (0.018) |
| Female                 | -0.05*** | (0.009) | -0.05*** | (0.009) | -0.05*** | (0.009) |
| Married                | -0.05*** | (0.010) | -0.05*** | (0.010) | -0.05*** | (0.010) |
| Insurance              | -0.03**  | (0.010) | -0.03**  | (0.010) | -0.03**  | (0.010) |
| Cohort                 | 0.01     | (0.020) | 0.01     | (0.020) | 0.01     | (0.020) |
| Wave                   | -0.00    | (0.008) | -0.00    | (0.008) | -0.00    | (0.008) |
| N                      | 33284    |         | 33284    |         | 33284    |         |

Standardized beta coefficients. Covariance, variance, and intercept estimates excluded for brevity.

\* p<0.05; \*\* p<0.01 \*\*\* p<0.001

**Appendix Table B2. Mex Am-White Simple Mediation Models**

| Equation outcome                     | <u>Self-rated health</u> |        | <u>Cum Bio Risk</u> |        | <u>Func Limitations</u> |        |
|--------------------------------------|--------------------------|--------|---------------------|--------|-------------------------|--------|
|                                      | $\beta$                  | SE     | $\beta$             | SE     | $\beta$                 | SE     |
| <b><u>Primary health outcome</u></b> |                          |        |                     |        |                         |        |
| Education                            | 0.19***                  | -0.011 | -0.11***            | -0.013 | -0.14***                | -0.012 |
| Income                               | 0.11***                  | -0.012 | -0.03*              | -0.012 | -0.09***                | -0.012 |
| Wealth                               | 0.07***                  | -0.011 | -0.06***            | -0.012 | -0.09***                | -0.012 |
| Discrim (daily)                      | -0.03**                  | -0.012 | 0                   | -0.012 | 0.05***                 | -0.013 |
| Discrim (2+ att)                     | -0.05***                 | -0.01  | 0.09***             | -0.011 | 0.08***                 | -0.01  |
| Discrim (Major)                      | 0.01                     | -0.01  | 0.02                | -0.011 | 0.02                    | -0.01  |
| Chr. Stressors                       | -0.12***                 | -0.01  | 0.03**              | -0.011 | 0.09***                 | -0.01  |
| Trauma                               | -0.09***                 | -0.01  | 0.04***             | -0.012 | 0.09***                 | -0.01  |
| Financial Strain                     | -0.10***                 | -0.011 | 0.06***             | -0.012 | 0.09***                 | -0.011 |
| Disorder                             | -0.03**                  | -0.012 | 0.01                | -0.013 | 0.04**                  | -0.013 |
| Mistrust                             | -0.06***                 | -0.013 | 0.01                | -0.013 | 0.03*                   | -0.013 |
| Mex Am                               | -0.03*                   | -0.012 | 0.02                | -0.014 | 0                       | -0.014 |
| Age                                  | -0.10***                 | -0.018 | -0.03               | -0.021 | 0.12***                 | -0.019 |
| Female                               | 0.04***                  | -0.01  | 0.01                | -0.011 | 0.11***                 | -0.01  |
| Married                              | 0                        | -0.01  | 0.01                | -0.012 | 0.01                    | -0.01  |
| Insurance                            | 0.04***                  | -0.011 | 0.02                | -0.011 | -0.06***                | -0.011 |
| Cohort                               | -0.01                    | -0.021 | -0.07**             | -0.023 | -0.03                   | -0.021 |
| Wave                                 | -0.01                    | -0.008 | -0.03***            | -0.008 | -0.01                   | -0.008 |
| Pharmacotreatment                    | -0.09***                 | -0.012 | 0.17***             | -0.011 | 0.05***                 | -0.011 |
| <b><u>Education</u></b>              |                          |        |                     |        |                         |        |
| Mex Am                               | -0.20***                 | -0.015 | -0.20***            | -0.015 | -0.20***                | -0.015 |
| Age                                  | -0.06**                  | -0.021 | -0.06**             | -0.021 | -0.06**                 | -0.021 |
| Female                               | -0.03*                   | -0.011 | -0.03*              | -0.011 | -0.03*                  | -0.011 |
| Married                              | 0.03*                    | -0.011 | 0.03*               | -0.011 | 0.03*                   | -0.011 |
| Insurance                            | 0.19***                  | -0.011 | 0.19***             | -0.011 | 0.19***                 | -0.011 |
| Cohort                               | 0.05*                    | -0.023 | 0.05*               | -0.023 | 0.05*                   | -0.023 |
| Wave                                 | -0.04***                 | -0.005 | -0.04***            | -0.005 | -0.04***                | -0.005 |
| <b><u>Income</u></b>                 |                          |        |                     |        |                         |        |
| Mex Am                               | -0.13***                 | -0.017 | -0.13***            | -0.017 | -0.13***                | -0.017 |
| Age                                  | -0.01                    | -0.017 | -0.01               | -0.017 | -0.01                   | -0.017 |
| Female                               | -0.01                    | -0.01  | -0.01               | -0.01  | -0.01                   | -0.01  |
| Married                              | 0.34***                  | -0.012 | 0.34***             | -0.012 | 0.34***                 | -0.012 |
| Insurance                            | 0.28***                  | -0.012 | 0.28***             | -0.012 | 0.28***                 | -0.012 |
| Cohort                               | 0.03                     | -0.02  | 0.03                | -0.02  | 0.03                    | -0.02  |
| Wave                                 | -0.05***                 | -0.01  | -0.05***            | -0.01  | -0.05***                | -0.01  |
| <b><u>Wealth</u></b>                 |                          |        |                     |        |                         |        |
| Mex Am                               | -0.08***                 | -0.015 | -0.08***            | -0.015 | -0.08***                | -0.015 |
| Age                                  | 0.11***                  | -0.021 | 0.11***             | -0.021 | 0.11***                 | -0.021 |
| Female                               | 0.01                     | -0.012 | 0.01                | -0.012 | 0.01                    | -0.012 |
| Married                              | 0.20***                  | -0.013 | 0.20***             | -0.013 | 0.20***                 | -0.013 |
| Insurance                            | 0.19***                  | -0.013 | 0.19***             | -0.013 | 0.19***                 | -0.013 |
| Cohort                               | -0.12***                 | -0.026 | -0.12***            | -0.026 | -0.12***                | -0.026 |
| Wave                                 | 0                        | -0.009 | 0                   | -0.009 | 0                       | -0.009 |
| <b><u>Discrim (daily)</u></b>        |                          |        |                     |        |                         |        |
| Education                            | -0.04**                  | -0.014 | -0.04**             | -0.014 | -0.04**                 | -0.014 |
| Income                               | -0.02                    | -0.011 | -0.02               | -0.011 | -0.02                   | -0.011 |
| Wealth                               | -0.10***                 | -0.013 | -0.10***            | -0.013 | -0.10***                | -0.013 |
| Mex Am                               | -0.02                    | -0.013 | -0.02               | -0.013 | -0.02                   | -0.013 |

|           |          |        |          |        |          |        |
|-----------|----------|--------|----------|--------|----------|--------|
| Age       | -0.16*** | -0.022 | -0.16*** | -0.022 | -0.16*** | -0.022 |
| Female    | -0.09*** | -0.011 | -0.09*** | -0.011 | -0.09*** | -0.011 |
| Married   | -0.06*** | -0.012 | -0.06*** | -0.012 | -0.06*** | -0.012 |
| Insurance | -0.02    | -0.012 | -0.02    | -0.012 | -0.02    | -0.012 |
| Cohort    | 0.03     | -0.025 | 0.03     | -0.025 | 0.03     | -0.025 |
| Wave      | 0.05***  | -0.009 | 0.05***  | -0.009 | 0.05***  | -0.009 |

**Discrim (2+ att)**

|           |          |        |          |        |          |        |
|-----------|----------|--------|----------|--------|----------|--------|
| Education | 0.01     | -0.012 | 0.01     | -0.012 | 0.01     | -0.012 |
| Income    | -0.05*** | -0.012 | -0.05*** | -0.012 | -0.05*** | -0.012 |
| Wealth    | -0.09*** | -0.012 | -0.09*** | -0.012 | -0.09*** | -0.012 |
| Mex Am    | 0.04**   | -0.014 | 0.04**   | -0.014 | 0.04**   | -0.014 |
| Age       | -0.08*** | -0.02  | -0.08*** | -0.02  | -0.08*** | -0.02  |
| Female    | 0.04***  | -0.011 | 0.04***  | -0.011 | 0.04***  | -0.011 |
| Married   | -0.04*** | -0.012 | -0.04*** | -0.012 | -0.04*** | -0.012 |
| Insurance | -0.02    | -0.011 | -0.02    | -0.011 | -0.02    | -0.011 |
| Cohort    | 0.01     | -0.023 | 0.01     | -0.023 | 0.01     | -0.023 |
| Wave      | -0.06*** | -0.01  | -0.06*** | -0.01  | -0.06*** | -0.01  |

**Discrim (Major)**

|           |          |        |          |        |          |        |
|-----------|----------|--------|----------|--------|----------|--------|
| Education | 0.08***  | -0.012 | 0.08***  | -0.012 | 0.08***  | -0.012 |
| Mex Am    | -0.01    | -0.013 | -0.01    | -0.013 | -0.01    | -0.013 |
| Age       | -0.16*** | -0.02  | -0.16*** | -0.02  | -0.16*** | -0.02  |
| Female    | -0.10*** | -0.012 | -0.10*** | -0.012 | -0.10*** | -0.012 |
| Married   | -0.07*** | -0.012 | -0.07*** | -0.012 | -0.07*** | -0.012 |
| Insurance | -0.11*** | -0.013 | -0.11*** | -0.013 | -0.11*** | -0.013 |
| Cohort    | 0.04     | -0.025 | 0.04     | -0.025 | 0.04     | -0.025 |
| Wave      | 0        | -0.01  | 0        | -0.01  | 0        | -0.01  |

**Chr. Stressors**

|           |          |        |          |        |          |        |
|-----------|----------|--------|----------|--------|----------|--------|
| Education | -0.02*   | -0.012 | -0.02*   | -0.012 | -0.03*   | -0.012 |
| Income    | -0.05*** | -0.012 | -0.05*** | -0.012 | -0.05*** | -0.012 |
| Wealth    | -0.14*** | -0.011 | -0.14*** | -0.011 | -0.14*** | -0.011 |
| Mex Am    | 0.01     | -0.016 | 0.01     | -0.016 | 0.01     | -0.016 |
| Age       | -0.14*** | -0.021 | -0.14*** | -0.021 | -0.14*** | -0.021 |
| Female    | 0.04***  | -0.011 | 0.04***  | -0.011 | 0.04***  | -0.011 |
| Married   | 0.02*    | -0.011 | 0.02*    | -0.011 | 0.02*    | -0.011 |
| Insurance | -0.05*** | -0.011 | -0.05*** | -0.011 | -0.05*** | -0.011 |
| Cohort    | 0.04     | -0.024 | 0.04     | -0.024 | 0.04     | -0.024 |
| Wave      | -0.07*** | -0.009 | -0.07*** | -0.009 | -0.07*** | -0.009 |

**Trauma**

|           |          |        |          |        |          |        |
|-----------|----------|--------|----------|--------|----------|--------|
| Education | 0.02     | -0.012 | 0.02     | -0.012 | 0.02     | -0.012 |
| Mex Am    | 0        | -0.015 | 0        | -0.015 | 0        | -0.015 |
| Age       | 0.03     | -0.021 | 0.03     | -0.021 | 0.03     | -0.021 |
| Female    | -0.01    | -0.011 | -0.01    | -0.011 | -0.01    | -0.011 |
| Married   | -0.05*** | -0.011 | -0.05*** | -0.011 | -0.05*** | -0.011 |
| Insurance | -0.10*** | -0.012 | -0.10*** | -0.012 | -0.10*** | -0.012 |
| Cohort    | -0.02    | -0.024 | -0.02    | -0.024 | -0.02    | -0.024 |
| Wave      | 0.04***  | -0.008 | 0.04***  | -0.008 | 0.04***  | -0.008 |

**Financial Strain**

|           |          |        |          |        |          |        |
|-----------|----------|--------|----------|--------|----------|--------|
| Education | -0.07*** | -0.012 | -0.07*** | -0.011 | -0.07*** | -0.012 |
| Income    | -0.14*** | -0.014 | -0.14*** | -0.014 | -0.14*** | -0.014 |
| Wealth    | -0.26*** | -0.011 | -0.26*** | -0.011 | -0.26*** | -0.011 |
| Mex Am    | -0.01    | -0.012 | -0.01    | -0.012 | -0.01    | -0.012 |
| Age       | -0.18*** | -0.019 | -0.18*** | -0.019 | -0.18*** | -0.019 |
| Female    | 0.03**   | -0.01  | 0.03**   | -0.01  | 0.03**   | -0.01  |
| Married   | 0        | -0.011 | 0        | -0.011 | 0        | -0.011 |



|                        |          |        |          |        |          |        |
|------------------------|----------|--------|----------|--------|----------|--------|
| Insurance              | -0.12*** | -0.011 | -0.12*** | -0.011 | -0.12*** | -0.011 |
| Cohort                 | 0.09***  | -0.021 | 0.09***  | -0.021 | 0.09***  | -0.021 |
| Wave                   | 0.02*    | -0.009 | 0.02*    | -0.009 | 0.02*    | -0.009 |
| <b><u>Disorder</u></b> |          |        |          |        |          |        |
| Education              | -0.13*** | -0.012 | -0.13*** | -0.012 | -0.13*** | -0.012 |
| Income                 | -0.06*** | -0.012 | -0.06*** | -0.012 | -0.06*** | -0.012 |
| Wealth                 | -0.10*** | -0.012 | -0.10*** | -0.012 | -0.10*** | -0.012 |
| Mex Am                 | 0.05***  | -0.013 | 0.05***  | -0.013 | 0.05***  | -0.013 |
| Age                    | -0.03    | -0.019 | -0.03    | -0.019 | -0.03    | -0.019 |
| Female                 | -0.01    | -0.01  | -0.01    | -0.01  | -0.01    | -0.01  |
| Married                | -0.03*   | -0.011 | -0.03*   | -0.011 | -0.03*   | -0.011 |
| Insurance              | -0.05*** | -0.011 | -0.05*** | -0.011 | -0.05*** | -0.011 |
| Cohort                 | 0.03     | -0.021 | 0.03     | -0.021 | 0.03     | -0.021 |
| Wave                   | -0.02*   | -0.009 | -0.02*   | -0.009 | -0.02*   | -0.009 |
| <b><u>Mistrust</u></b> |          |        |          |        |          |        |
| Education              | -0.07*** | -0.012 | -0.07*** | -0.012 | -0.07*** | -0.012 |
| Income                 | -0.05*** | -0.012 | -0.05*** | -0.012 | -0.05*** | -0.012 |
| Wealth                 | -0.11*** | -0.012 | -0.11*** | -0.012 | -0.11*** | -0.012 |
| Mex Am                 | 0.01     | -0.012 | 0.01     | -0.012 | 0.01     | -0.012 |
| Age                    | -0.09*** | -0.02  | -0.09*** | -0.02  | -0.09*** | -0.02  |
| Female                 | -0.05*** | -0.01  | -0.05*** | -0.01  | -0.05*** | -0.01  |
| Married                | -0.05*** | -0.011 | -0.05*** | -0.011 | -0.05*** | -0.011 |
| Insurance              | -0.03*   | -0.011 | -0.03*   | -0.011 | -0.03*   | -0.011 |
| Cohort                 | 0        | -0.022 | 0        | -0.022 | 0        | -0.022 |
| Wave                   | 0        | -0.009 | 0        | -0.009 | 0        | -0.009 |
| N                      | 26935    |        | 26935    |        | 26935    |        |

Standardized beta coefficients. Covariance, variance, and intercept estimates excluded for brevity.

\* p<0.05 \*\* p<0.01; \*\*\* p<0.001

**Appendix Table B3. Black-White Moderated Mediation Models**

| Equation outcome                     | <u>Self-rated health</u> |         | <u>Cum Bio Risk</u> |         | <u>Func Limitations</u> |         |
|--------------------------------------|--------------------------|---------|---------------------|---------|-------------------------|---------|
|                                      | $\beta$                  | SE      | $\beta$             | SE      | $\beta$                 | SE      |
| <b><u>Primary health outcome</u></b> |                          |         |                     |         |                         |         |
| Education                            | 0.18***                  | (0.010) | -0.09***            | (0.012) | -0.15***                | (0.011) |
| Income                               | 0.12***                  | (0.011) | -0.02*              | (0.011) | -0.09***                | (0.011) |
| Wealth                               | 0.08***                  | (0.010) | -0.06***            | (0.011) | -0.09***                | (0.012) |
| Discrim (daily)                      | -0.03**                  | (0.011) | 0.00                | (0.011) | 0.04**                  | (0.011) |
| Discrim (2+ att)                     | -0.05***                 | (0.009) | 0.08***             | (0.010) | 0.07***                 | (0.010) |
| Discrim (Major)                      | 0.01                     | (0.009) | 0.01                | (0.010) | 0.02*                   | (0.010) |
| Chr. Stressors                       | -0.11***                 | (0.009) | 0.03**              | (0.010) | 0.10***                 | (0.010) |
| Trauma                               | -0.10***                 | (0.009) | 0.04***             | (0.011) | 0.10***                 | (0.010) |
| Financial Strain                     | -0.10***                 | (0.011) | 0.05***             | (0.011) | 0.10***                 | (0.011) |
| Disorder                             | -0.04**                  | (0.012) | 0.00                | (0.013) | 0.04**                  | (0.012) |
| Mistrust                             | -0.05***                 | (0.012) | 0.01                | (0.013) | 0.03*                   | (0.013) |
| Black                                | -0.05***                 | (0.012) | 0.12***             | (0.015) | -0.01                   | (0.013) |
| Age                                  | -0.09***                 | (0.017) | -0.01               | (0.019) | 0.12***                 | (0.018) |
| Female                               | 0.03***                  | (0.009) | 0.03**              | (0.010) | 0.12***                 | (0.009) |
| Married                              | -0.00                    | (0.010) | 0.01                | (0.011) | 0.02                    | (0.010) |
| Insurance                            | 0.04***                  | (0.010) | 0.01                | (0.010) | -0.08***                | (0.010) |
| Cohort                               | -0.01                    | (0.020) | -0.05*              | (0.022) | -0.01                   | (0.020) |
| Wave                                 | -0.01                    | (0.008) | -0.03***            | (0.007) | -0.00                   | (0.007) |
| Pharmacotherapy                      | -0.09***                 | (0.011) | 0.16***             | (0.010) | 0.05***                 | (0.010) |
| White*Education                      | 0.01                     | (0.010) | -0.05***            | (0.013) | 0.01                    | (0.012) |
| White*Income                         | 0.02*                    | (0.009) | -0.01               | (0.010) | -0.01                   | (0.009) |
| White*Wealth                         | -0.00                    | (0.009) | -0.01               | (0.010) | 0.00                    | (0.011) |
| White*Discrim (daily)                | -0.01                    | (0.010) | 0.01                | (0.012) | 0.02                    | (0.012) |
| White*Discrim (2+ att)               | -0.03**                  | (0.009) | 0.02                | (0.011) | 0.03*                   | (0.011) |
| White*Discrim (Major)                | 0.01                     | (0.008) | 0.02                | (0.010) | -0.00                   | (0.010) |
| White*Chr. Stressors                 | -0.01                    | (0.010) | -0.00               | (0.011) | -0.02*                  | (0.011) |
| White*Trauma                         | -0.00                    | (0.010) | 0.02                | (0.012) | -0.02                   | (0.011) |
| White*Financial Strain               | 0.01                     | (0.011) | 0.01                | (0.013) | -0.01                   | (0.013) |
| White*Disorder                       | 0.01                     | (0.012) | 0.01                | (0.014) | 0.00                    | (0.013) |
| White*Mistrust                       | -0.02                    | (0.012) | -0.00               | (0.014) | 0.01                    | (0.014) |
| <b><u>Education</u></b>              |                          |         |                     |         |                         |         |
| Black                                | -0.17***                 | (0.012) | -0.17***            | (0.012) | -0.17***                | (0.012) |
| Age                                  | -0.07***                 | (0.020) | -0.07***            | (0.020) | -0.07***                | (0.020) |
| Female                               | -0.01                    | (0.010) | -0.01               | (0.010) | -0.01                   | (0.010) |
| Married                              | 0.03**                   | (0.011) | 0.03**              | (0.011) | 0.03**                  | (0.011) |
| Insurance                            | 0.20***                  | (0.011) | 0.20***             | (0.011) | 0.20***                 | (0.011) |
| Cohort                               | 0.05*                    | (0.023) | 0.05*               | (0.023) | 0.05*                   | (0.023) |
| Wave                                 | -0.05***                 | (0.005) | -0.05***            | (0.005) | -0.05***                | (0.005) |
| <b><u>Income</u></b>                 |                          |         |                     |         |                         |         |
| Black                                | -0.20***                 | (0.014) | -0.20***            | (0.014) | -0.20***                | (0.014) |

|                                |          |         |          |         |          |         |
|--------------------------------|----------|---------|----------|---------|----------|---------|
| Age                            | -0.01    | (0.016) | -0.01    | (0.016) | -0.01    | (0.016) |
| Female                         | -0.02    | (0.009) | -0.02    | (0.009) | -0.02    | (0.009) |
| Married                        | 0.34***  | (0.011) | 0.34***  | (0.011) | 0.34***  | (0.011) |
| Insurance                      | 0.27***  | (0.011) | 0.27***  | (0.011) | 0.27***  | (0.011) |
| Cohort                         | 0.02     | (0.018) | 0.02     | (0.018) | 0.02     | (0.018) |
| Wave                           | -0.05*** | (0.009) | -0.05*** | (0.009) | -0.05*** | (0.009) |
| <b><u>Wealth</u></b>           |          |         |          |         |          |         |
| Black                          | -0.23*** | (0.015) | -0.23*** | (0.015) | -0.23*** | (0.015) |
| Age                            | 0.11***  | (0.019) | 0.11***  | (0.019) | 0.11***  | (0.019) |
| Female                         | -0.00    | (0.010) | -0.00    | (0.010) | -0.00    | (0.010) |
| Married                        | 0.19***  | (0.012) | 0.19***  | (0.012) | 0.19***  | (0.012) |
| Insurance                      | 0.19***  | (0.011) | 0.18***  | (0.011) | 0.19***  | (0.011) |
| Cohort                         | -0.11*** | (0.023) | -0.11*** | (0.023) | -0.11*** | (0.023) |
| Wave                           | 0.00     | (0.008) | 0.00     | (0.008) | 0.00     | (0.008) |
| <b><u>Discrim (daily)</u></b>  |          |         |          |         |          |         |
| Education                      | -0.05*** | (0.013) | -0.05*** | (0.013) | -0.05*** | (0.013) |
| Income                         | -0.02    | (0.011) | -0.02    | (0.011) | -0.02    | (0.011) |
| Wealth                         | -0.09*** | (0.012) | -0.09*** | (0.012) | -0.09*** | (0.012) |
| Black                          | 0.06***  | (0.014) | 0.06***  | (0.014) | 0.06***  | (0.014) |
| Age                            | -0.16*** | (0.020) | -0.16*** | (0.020) | -0.16*** | (0.020) |
| Female                         | -0.10*** | (0.011) | -0.10*** | (0.011) | -0.10*** | (0.011) |
| Married                        | -0.06*** | (0.012) | -0.06*** | (0.012) | -0.06*** | (0.012) |
| Insurance                      | -0.02*   | (0.011) | -0.02*   | (0.011) | -0.02*   | (0.011) |
| Cohort                         | 0.04     | (0.023) | 0.04     | (0.023) | 0.04     | (0.023) |
| Wave                           | 0.05***  | (0.009) | 0.05***  | (0.009) | 0.05***  | (0.009) |
| White*Education                | 0.01     | (0.014) | 0.01     | (0.014) | 0.01     | (0.014) |
| White*Income                   | -0.02    | (0.010) | -0.02    | (0.010) | -0.02    | (0.010) |
| White*Wealth                   | -0.03*   | (0.012) | -0.03*   | (0.012) | -0.03*   | (0.012) |
| <b><u>Discrim (2+ att)</u></b> |          |         |          |         |          |         |
| Education                      | 0.02     | (0.011) | 0.02     | (0.011) | 0.02     | (0.011) |
| Income                         | -0.04*** | (0.011) | -0.04*** | (0.011) | -0.04*** | (0.011) |
| Wealth                         | -0.09*** | (0.011) | -0.09*** | (0.011) | -0.09*** | (0.011) |
| Black                          | 0.16***  | (0.013) | 0.16***  | (0.013) | 0.16***  | (0.013) |
| Age                            | -0.07*** | (0.018) | -0.07*** | (0.018) | -0.07*** | (0.018) |
| Female                         | 0.04***  | (0.010) | 0.04***  | (0.010) | 0.04***  | (0.010) |
| Married                        | -0.04*** | (0.011) | -0.04*** | (0.011) | -0.04*** | (0.011) |
| Insurance                      | -0.01    | (0.010) | -0.01    | (0.010) | -0.01    | (0.010) |
| Cohort                         | 0.02     | (0.021) | 0.02     | (0.021) | 0.02     | (0.021) |
| Wave                           | -0.05*** | (0.009) | -0.05*** | (0.009) | -0.05*** | (0.009) |
| White*Education                | -0.02    | (0.011) | -0.02    | (0.011) | -0.02    | (0.011) |
| White*Income                   | -0.02*   | (0.010) | -0.02*   | (0.010) | -0.02*   | (0.010) |
| White*Wealth                   | -0.02    | (0.011) | -0.02    | (0.011) | -0.02    | (0.011) |
| <b><u>Discrim (Major)</u></b>  |          |         |          |         |          |         |
| Education                      | 0.10***  | (0.011) | 0.10***  | (0.011) | 0.10***  | (0.011) |
| Black                          | 0.15***  | (0.016) | 0.15***  | (0.016) | 0.15***  | (0.016) |

|                 |          |         |          |         |          |         |
|-----------------|----------|---------|----------|---------|----------|---------|
| Age             | -0.15*** | (0.018) | -0.15*** | (0.018) | -0.15*** | (0.018) |
| Female          | -0.09*** | (0.011) | -0.09*** | (0.011) | -0.09*** | (0.011) |
| Married         | -0.07*** | (0.011) | -0.07*** | (0.011) | -0.07*** | (0.011) |
| Insurance       | -0.10*** | (0.012) | -0.10*** | (0.012) | -0.10*** | (0.012) |
| Cohort          | 0.04     | (0.022) | 0.04     | (0.022) | 0.04     | (0.022) |
| Wave            | 0.01     | (0.009) | 0.01     | (0.009) | 0.01     | (0.009) |
| White*Education | -0.06*** | (0.013) | -0.06*** | (0.013) | -0.06*** | (0.013) |

**Chr. Stressors**

|                 |          |         |          |         |          |         |
|-----------------|----------|---------|----------|---------|----------|---------|
| Education       | -0.04*** | (0.010) | -0.04*** | (0.010) | -0.04*** | (0.010) |
| Income          | -0.04*** | (0.011) | -0.04*** | (0.011) | -0.04*** | (0.011) |
| Wealth          | -0.14*** | (0.011) | -0.14*** | (0.011) | -0.14*** | (0.011) |
| Black           | 0.09***  | (0.013) | 0.09***  | (0.013) | 0.09***  | (0.013) |
| Age             | -0.13*** | (0.019) | -0.13*** | (0.019) | -0.13*** | (0.019) |
| Female          | 0.03**   | (0.010) | 0.03**   | (0.010) | 0.03**   | (0.010) |
| Married         | 0.03*    | (0.011) | 0.03*    | (0.011) | 0.03*    | (0.011) |
| Insurance       | -0.06*** | (0.010) | -0.06*** | (0.010) | -0.06*** | (0.010) |
| Cohort          | 0.05*    | (0.023) | 0.05*    | (0.023) | 0.05*    | (0.023) |
| Wave            | -0.07*** | (0.008) | -0.07*** | (0.008) | -0.07*** | (0.008) |
| White*Education | 0.01     | (0.011) | 0.01     | (0.011) | 0.01     | (0.011) |
| White*Income    | -0.03**  | (0.010) | -0.03**  | (0.010) | -0.03**  | (0.010) |
| White*Wealth    | -0.02*   | (0.010) | -0.02*   | (0.010) | -0.02*   | (0.010) |

**Trauma**

|                 |          |         |          |         |          |         |
|-----------------|----------|---------|----------|---------|----------|---------|
| Education       | 0.02     | (0.011) | 0.02     | (0.011) | 0.02     | (0.011) |
| Black           | 0.01     | (0.013) | 0.01     | (0.013) | 0.01     | (0.013) |
| Age             | 0.03     | (0.020) | 0.03     | (0.020) | 0.03     | (0.020) |
| Female          | -0.01    | (0.011) | -0.01    | (0.011) | -0.01    | (0.011) |
| Married         | -0.05*** | (0.011) | -0.05*** | (0.011) | -0.05*** | (0.011) |
| Insurance       | -0.10*** | (0.011) | -0.10*** | (0.011) | -0.10*** | (0.011) |
| Cohort          | -0.02    | (0.023) | -0.02    | (0.023) | -0.02    | (0.023) |
| Wave            | 0.04***  | (0.008) | 0.04***  | (0.008) | 0.04***  | (0.008) |
| White*Education | -0.02    | (0.011) | -0.02    | (0.011) | -0.02    | (0.011) |

**Financial Strain**

|                 |          |         |          |         |          |         |
|-----------------|----------|---------|----------|---------|----------|---------|
| Education       | -0.08*** | (0.011) | -0.08*** | (0.011) | -0.08*** | (0.011) |
| Income          | -0.13*** | (0.013) | -0.13*** | (0.013) | -0.13*** | (0.013) |
| Wealth          | -0.26*** | (0.011) | -0.26*** | (0.011) | -0.26*** | (0.011) |
| Black           | 0.07***  | (0.012) | 0.07***  | (0.012) | 0.07***  | (0.012) |
| Age             | -0.17*** | (0.017) | -0.17*** | (0.017) | -0.17*** | (0.017) |
| Female          | 0.03***  | (0.009) | 0.03***  | (0.009) | 0.03***  | (0.009) |
| Married         | 0.00     | (0.011) | 0.00     | (0.011) | 0.00     | (0.011) |
| Insurance       | -0.12*** | (0.010) | -0.12*** | (0.010) | -0.12*** | (0.010) |
| Cohort          | 0.09***  | (0.020) | 0.09***  | (0.020) | 0.09***  | (0.020) |
| Wave            | 0.02*    | (0.008) | 0.02*    | (0.008) | 0.02*    | (0.008) |
| White*Education | 0.00     | (0.012) | 0.00     | (0.012) | 0.00     | (0.012) |
| White*Income    | -0.05*** | (0.010) | -0.05*** | (0.010) | -0.05*** | (0.010) |
| White*Wealth    | -0.06*** | (0.010) | -0.06*** | (0.010) | -0.06*** | (0.010) |

**Disorder**

|                 |          |         |          |         |          |         |
|-----------------|----------|---------|----------|---------|----------|---------|
| Education       | -0.13*** | (0.011) | -0.13*** | (0.011) | -0.13*** | (0.011) |
| Income          | -0.05*** | (0.012) | -0.05*** | (0.012) | -0.05*** | (0.012) |
| Wealth          | -0.10*** | (0.011) | -0.10*** | (0.011) | -0.10*** | (0.011) |
| Black           | 0.22***  | (0.014) | 0.22***  | (0.014) | 0.22***  | (0.014) |
| Age             | -0.03    | (0.017) | -0.03    | (0.017) | -0.03    | (0.017) |
| Female          | -0.01    | (0.009) | -0.01    | (0.009) | -0.01    | (0.009) |
| Married         | -0.03**  | (0.011) | -0.03**  | (0.011) | -0.03**  | (0.011) |
| Insurance       | -0.05*** | (0.010) | -0.05*** | (0.010) | -0.05*** | (0.010) |
| Cohort          | 0.04     | (0.020) | 0.04*    | (0.020) | 0.04*    | (0.020) |
| Wave            | -0.02*   | (0.008) | -0.02*   | (0.008) | -0.02*   | (0.008) |
| White*Education | -0.00    | (0.012) | -0.00    | (0.012) | -0.00    | (0.012) |
| White*Income    | -0.02*   | (0.012) | -0.02*   | (0.012) | -0.02*   | (0.012) |
| White*Wealth    | -0.01    | (0.011) | -0.02    | (0.011) | -0.01    | (0.011) |

**Mistrust**

|                 |          |         |          |         |          |         |
|-----------------|----------|---------|----------|---------|----------|---------|
| Education       | -0.07*** | (0.011) | -0.07*** | (0.011) | -0.07*** | (0.011) |
| Income          | -0.04*** | (0.012) | -0.04*** | (0.012) | -0.04*** | (0.012) |
| Wealth          | -0.12*** | (0.011) | -0.12*** | (0.011) | -0.12*** | (0.011) |
| Black           | 0.18***  | (0.013) | 0.18***  | (0.013) | 0.18***  | (0.013) |
| Age             | -0.09*** | (0.018) | -0.09*** | (0.018) | -0.09*** | (0.018) |
| Female          | -0.05*** | (0.009) | -0.05*** | (0.009) | -0.05*** | (0.009) |
| Married         | -0.04*** | (0.010) | -0.04*** | (0.010) | -0.04*** | (0.010) |
| Insurance       | -0.03**  | (0.010) | -0.03**  | (0.010) | -0.03**  | (0.010) |
| Cohort          | 0.01     | (0.020) | 0.01     | (0.020) | 0.01     | (0.020) |
| Wave            | -0.00    | (0.008) | -0.00    | (0.008) | -0.00    | (0.008) |
| White*Education | 0.00     | (0.012) | 0.00     | (0.012) | 0.00     | (0.012) |
| White*Income    | -0.02    | (0.013) | -0.02    | (0.013) | -0.02    | (0.013) |
| White*Wealth    | -0.01    | (0.011) | -0.01    | (0.011) | -0.01    | (0.011) |

---

|   |       |       |       |
|---|-------|-------|-------|
| N | 33284 | 33284 | 33284 |
|---|-------|-------|-------|

---

Standardized beta coefficients. Covariance, variance, and intercept estimates excluded for brevity.

\* p&lt;0.05; \*\* p&lt;0.01; \*\*\* p&lt;0.001

**Appendix Table B4. Mex Am-White Moderated Mediation Models**

| Equation outcome                     | <u>Self-rated health</u> |         | <u>Cum Bio Risk</u> |         | <u>Func Limitations</u> |         |
|--------------------------------------|--------------------------|---------|---------------------|---------|-------------------------|---------|
|                                      | $\beta$                  | SE      | $\beta$             | SE      | $\beta$                 | SE      |
| <b><u>Primary health outcome</u></b> |                          |         |                     |         |                         |         |
| Education                            | 0.19***                  | (0.011) | -0.12***            | (0.013) | -0.15***                | (0.011) |
| Income                               | 0.12***                  | (0.012) | -0.03*              | (0.012) | -0.09***                | (0.012) |
| Wealth                               | 0.07***                  | (0.011) | -0.06***            | (0.012) | -0.09***                | (0.012) |
| Discrim (daily)                      | -0.03**                  | (0.011) | 0.00                | (0.012) | 0.05***                 | (0.012) |
| Discrim (2+ att)                     | -0.05***                 | (0.010) | 0.09***             | (0.011) | 0.08***                 | (0.010) |
| Discrim (Major)                      | 0.01                     | (0.010) | 0.02                | (0.011) | 0.02                    | (0.010) |
| Chr. Stressors                       | -0.12***                 | (0.010) | 0.03**              | (0.011) | 0.09***                 | (0.010) |
| Trauma                               | -0.09***                 | (0.010) | 0.04***             | (0.011) | 0.09***                 | (0.010) |
| Financial Strain                     | -0.10***                 | (0.011) | 0.06***             | (0.012) | 0.09***                 | (0.011) |
| Disorder                             | -0.03**                  | (0.012) | 0.01                | (0.013) | 0.04**                  | (0.013) |
| Mistrust                             | -0.06***                 | (0.013) | 0.01                | (0.013) | 0.03*                   | (0.013) |
| Mex Am                               | -0.04**                  | (0.014) | 0.04**              | (0.016) | 0.01                    | (0.015) |
| Age                                  | -0.10***                 | (0.018) | -0.03               | (0.021) | 0.12***                 | (0.019) |
| Female                               | 0.04***                  | (0.010) | 0.01                | (0.011) | 0.11***                 | (0.010) |
| Married                              | 0.00                     | (0.010) | 0.01                | (0.012) | 0.01                    | (0.010) |
| Insurance                            | 0.04***                  | (0.011) | 0.02                | (0.011) | -0.06***                | (0.011) |
| Cohort                               | -0.01                    | (0.021) | -0.07**             | (0.023) | -0.03                   | (0.021) |
| Wave                                 | -0.01                    | (0.008) | -0.03***            | (0.008) | -0.01                   | (0.008) |
| Pharmacotherapy                      | -0.09***                 | (0.012) | 0.17***             | (0.011) | 0.05***                 | (0.011) |
| White*Education                      | 0.02*                    | (0.009) | -0.03**             | (0.011) | -0.02                   | (0.011) |
| White*Income                         | 0.01                     | (0.008) | -0.00               | (0.008) | -0.00                   | (0.008) |
| White*Wealth                         | -0.01                    | (0.008) | -0.00               | (0.012) | 0.02*                   | (0.012) |
| White*Discrim (daily)                | -0.02                    | (0.011) | 0.01                | (0.012) | -0.01                   | (0.015) |
| White*Discrim (2+ att)               | -0.02                    | (0.011) | 0.02*               | (0.012) | 0.02                    | (0.011) |
| White*Discrim (Major)                | 0.01                     | (0.010) | 0.00                | (0.014) | 0.02                    | (0.013) |
| White*Chr. Stressors                 | 0.01                     | (0.010) | 0.00                | (0.013) | -0.01                   | (0.014) |
| White*Trauma                         | -0.04***                 | (0.010) | 0.03*               | (0.012) | 0.01                    | (0.011) |
| White*Financial Strain               | -0.00                    | (0.013) | -0.02               | (0.015) | 0.00                    | (0.015) |
| White*Disorder                       | -0.00                    | (0.013) | -0.01               | (0.014) | 0.00                    | (0.014) |
| White*Mistrust                       | 0.01                     | (0.012) | -0.01               | (0.014) | -0.00                   | (0.015) |
| <b><u>Education</u></b>              |                          |         |                     |         |                         |         |
| Mex Am                               | -0.20***                 | (0.015) | -0.20***            | (0.015) | -0.20***                | (0.015) |
| Age                                  | -0.06**                  | (0.021) | -0.06**             | (0.021) | -0.06**                 | (0.021) |
| Female                               | -0.03*                   | (0.011) | -0.03*              | (0.011) | -0.03*                  | (0.011) |
| Married                              | 0.02*                    | (0.011) | 0.02*               | (0.011) | 0.02*                   | (0.011) |
| Insurance                            | 0.19***                  | (0.011) | 0.19***             | (0.011) | 0.19***                 | (0.011) |
| Cohort                               | 0.05*                    | (0.023) | 0.05*               | (0.023) | 0.05*                   | (0.023) |
| Wave                                 | -0.04***                 | (0.005) | -0.04***            | (0.005) | -0.04***                | (0.005) |
| <b><u>Income</u></b>                 |                          |         |                     |         |                         |         |
| Mex Am                               | -0.13***                 | (0.017) | -0.13***            | (0.017) | -0.13***                | (0.017) |
| Age                                  | -0.01                    | (0.017) | -0.01               | (0.017) | -0.01                   | (0.017) |

|           |          |         |          |         |          |         |
|-----------|----------|---------|----------|---------|----------|---------|
| Female    | -0.01    | (0.010) | -0.01    | (0.010) | -0.01    | (0.010) |
| Married   | 0.34***  | (0.012) | 0.34***  | (0.012) | 0.34***  | (0.012) |
| Insurance | 0.28***  | (0.012) | 0.28***  | (0.012) | 0.28***  | (0.012) |
| Cohort    | 0.03     | (0.020) | 0.03     | (0.020) | 0.03     | (0.020) |
| Wave      | -0.05*** | (0.010) | -0.05*** | (0.010) | -0.05*** | (0.010) |

**Wealth**

|           |          |         |          |         |          |         |
|-----------|----------|---------|----------|---------|----------|---------|
| Mex Am    | -0.08*** | (0.015) | -0.08*** | (0.015) | -0.08*** | (0.015) |
| Age       | 0.11***  | (0.021) | 0.11***  | (0.021) | 0.11***  | (0.021) |
| Female    | 0.01     | (0.012) | 0.01     | (0.012) | 0.01     | (0.012) |
| Married   | 0.20***  | (0.013) | 0.20***  | (0.013) | 0.20***  | (0.013) |
| Insurance | 0.19***  | (0.013) | 0.19***  | (0.013) | 0.19***  | (0.013) |
| Cohort    | -0.12*** | (0.026) | -0.12*** | (0.026) | -0.12*** | (0.026) |
| Wave      | 0.00     | (0.009) | 0.00     | (0.009) | 0.00     | (0.009) |

**Discrim (daily)**

|                 |          |         |          |         |          |         |
|-----------------|----------|---------|----------|---------|----------|---------|
| Education       | -0.04**  | (0.014) | -0.04**  | (0.014) | -0.04**  | (0.014) |
| Income          | -0.02    | (0.012) | -0.02    | (0.012) | -0.02    | (0.012) |
| Wealth          | -0.10*** | (0.013) | -0.10*** | (0.013) | -0.10*** | (0.013) |
| Mex Am          | 0.00     | (0.013) | 0.00     | (0.013) | 0.00     | (0.013) |
| Age             | -0.16*** | (0.022) | -0.16*** | (0.022) | -0.16*** | (0.022) |
| Female          | -0.09*** | (0.011) | -0.09*** | (0.011) | -0.09*** | (0.011) |
| Married         | -0.06*** | (0.012) | -0.06*** | (0.012) | -0.06*** | (0.012) |
| Insurance       | -0.02    | (0.012) | -0.02    | (0.012) | -0.02    | (0.012) |
| Cohort          | 0.03     | (0.025) | 0.03     | (0.025) | 0.03     | (0.025) |
| Wave            | 0.05***  | (0.009) | 0.05***  | (0.009) | 0.05***  | (0.009) |
| White*Education | -0.02    | (0.011) | -0.02    | (0.011) | -0.02    | (0.011) |
| White*Income    | -0.01*   | (0.006) | -0.01*   | (0.006) | -0.01*   | (0.006) |
| White*Wealth    | 0.01     | (0.012) | 0.01     | (0.012) | 0.01     | (0.012) |

**Discrim (2+ att)**

|                 |          |         |          |         |          |         |
|-----------------|----------|---------|----------|---------|----------|---------|
| Education       | 0.01     | (0.012) | 0.01     | (0.012) | 0.01     | (0.012) |
| Income          | -0.05*** | (0.012) | -0.05*** | (0.012) | -0.05*** | (0.012) |
| Wealth          | -0.09*** | (0.012) | -0.09*** | (0.012) | -0.09*** | (0.012) |
| Mex Am          | 0.06***  | (0.017) | 0.06***  | (0.017) | 0.06***  | (0.017) |
| Age             | -0.08*** | (0.020) | -0.08*** | (0.020) | -0.08*** | (0.020) |
| Female          | 0.04***  | (0.011) | 0.04***  | (0.011) | 0.04***  | (0.011) |
| Married         | -0.04*** | (0.012) | -0.04*** | (0.012) | -0.04*** | (0.012) |
| Insurance       | -0.02    | (0.011) | -0.02    | (0.011) | -0.02    | (0.011) |
| Cohort          | 0.01     | (0.023) | 0.01     | (0.023) | 0.01     | (0.023) |
| Wave            | -0.06*** | (0.010) | -0.06*** | (0.010) | -0.06*** | (0.010) |
| White*Education | -0.02    | (0.010) | -0.02    | (0.010) | -0.02    | (0.010) |
| White*Income    | -0.02*   | (0.007) | -0.02*   | (0.007) | -0.02*   | (0.007) |
| White*Wealth    | -0.01    | (0.010) | -0.01    | (0.010) | -0.01    | (0.010) |

**Discrim (Major)**

|           |          |         |          |         |          |         |
|-----------|----------|---------|----------|---------|----------|---------|
| Education | 0.08***  | (0.012) | 0.08***  | (0.012) | 0.08***  | (0.012) |
| Mex Am    | 0.01     | (0.015) | 0.01     | (0.015) | 0.01     | (0.015) |
| Age       | -0.16*** | (0.020) | -0.16*** | (0.020) | -0.16*** | (0.020) |

|                 |          |         |          |         |          |         |
|-----------------|----------|---------|----------|---------|----------|---------|
| Female          | -0.10*** | (0.012) | -0.10*** | (0.012) | -0.10*** | (0.012) |
| Married         | -0.07*** | (0.012) | -0.07*** | (0.012) | -0.07*** | (0.012) |
| Insurance       | -0.11*** | (0.013) | -0.11*** | (0.013) | -0.11*** | (0.013) |
| Cohort          | 0.04     | (0.024) | 0.04     | (0.024) | 0.04     | (0.024) |
| Wave            | -0.00    | (0.010) | -0.00    | (0.010) | -0.00    | (0.010) |
| White*Education | -0.02**  | (0.009) | -0.02**  | (0.009) | -0.02**  | (0.009) |

**Chr. Stressors**

|                 |          |         |          |         |          |         |
|-----------------|----------|---------|----------|---------|----------|---------|
| Education       | -0.02*   | (0.012) | -0.02*   | (0.012) | -0.02*   | (0.012) |
| Income          | -0.05*** | (0.012) | -0.05*** | (0.012) | -0.05*** | (0.012) |
| Wealth          | -0.14*** | (0.011) | -0.14*** | (0.011) | -0.14*** | (0.011) |
| Mex Am          | 0.04*    | (0.020) | 0.04*    | (0.020) | 0.04*    | (0.020) |
| Age             | -0.14*** | (0.021) | -0.14*** | (0.021) | -0.14*** | (0.021) |
| Female          | 0.04***  | (0.011) | 0.04***  | (0.011) | 0.04***  | (0.011) |
| Married         | 0.02*    | (0.011) | 0.02*    | (0.011) | 0.02*    | (0.011) |
| Insurance       | -0.05*** | (0.011) | -0.05*** | (0.011) | -0.05*** | (0.011) |
| Cohort          | 0.04     | (0.024) | 0.04     | (0.024) | 0.04     | (0.024) |
| Wave            | -0.07*** | (0.009) | -0.07*** | (0.009) | -0.07*** | (0.009) |
| White*Education | -0.04**  | (0.012) | -0.04**  | (0.012) | -0.04**  | (0.012) |
| White*Income    | -0.02    | (0.009) | -0.02    | (0.009) | -0.02    | (0.009) |
| White*Wealth    | -0.01    | (0.011) | -0.00    | (0.011) | -0.01    | (0.011) |

**Trauma**

|                 |          |         |          |         |          |         |
|-----------------|----------|---------|----------|---------|----------|---------|
| Education       | 0.02     | (0.012) | 0.02     | (0.012) | 0.02     | (0.012) |
| Mex Am          | 0.02     | (0.017) | 0.02     | (0.017) | 0.02     | (0.017) |
| Age             | 0.03     | (0.021) | 0.03     | (0.021) | 0.03     | (0.021) |
| Female          | -0.01    | (0.011) | -0.01    | (0.011) | -0.01    | (0.011) |
| Married         | -0.05*** | (0.011) | -0.05*** | (0.011) | -0.05*** | (0.011) |
| Insurance       | -0.10*** | (0.012) | -0.10*** | (0.012) | -0.10*** | (0.012) |
| Cohort          | -0.02    | (0.024) | -0.02    | (0.024) | -0.02    | (0.024) |
| Wave            | 0.04***  | (0.008) | 0.04***  | (0.008) | 0.04***  | (0.008) |
| White*Education | -0.04*** | (0.010) | -0.04*** | (0.010) | -0.04*** | (0.010) |

**Financial Strain**

|                 |          |         |          |         |          |         |
|-----------------|----------|---------|----------|---------|----------|---------|
| Education       | -0.07*** | (0.012) | -0.07*** | (0.012) | -0.07*** | (0.012) |
| Income          | -0.15*** | (0.015) | -0.14*** | (0.015) | -0.15*** | (0.015) |
| Wealth          | -0.26*** | (0.011) | -0.26*** | (0.011) | -0.26*** | (0.011) |
| Mex Am          | 0.03*    | (0.014) | 0.03*    | (0.014) | 0.03*    | (0.014) |
| Age             | -0.18*** | (0.019) | -0.18*** | (0.019) | -0.18*** | (0.019) |
| Female          | 0.03**   | (0.010) | 0.03**   | (0.010) | 0.03**   | (0.010) |
| Married         | 0.00     | (0.011) | 0.00     | (0.011) | 0.00     | (0.011) |
| Insurance       | -0.12*** | (0.011) | -0.12*** | (0.011) | -0.12*** | (0.011) |
| Cohort          | 0.09***  | (0.021) | 0.09***  | (0.021) | 0.09***  | (0.021) |
| Wave            | 0.02     | (0.009) | 0.02     | (0.009) | 0.02     | (0.009) |
| White*Education | -0.03**  | (0.009) | -0.03**  | (0.009) | -0.03**  | (0.009) |
| White*Income    | -0.02*   | (0.010) | -0.02*   | (0.010) | -0.02*   | (0.010) |
| White*Wealth    | -0.03**  | (0.009) | -0.03**  | (0.009) | -0.03**  | (0.009) |

**Disorder**



|                 |          |         |          |         |          |         |
|-----------------|----------|---------|----------|---------|----------|---------|
| Education       | -0.13*** | (0.012) | -0.13*** | (0.012) | -0.13*** | (0.012) |
| Income          | -0.06*** | (0.012) | -0.06*** | (0.012) | -0.06*** | (0.012) |
| Wealth          | -0.10*** | (0.012) | -0.10*** | (0.012) | -0.10*** | (0.012) |
| Mex Am          | 0.07***  | (0.015) | 0.07***  | (0.015) | 0.07***  | (0.015) |
| Age             | -0.03    | (0.019) | -0.03    | (0.019) | -0.03    | (0.019) |
| Female          | -0.01    | (0.010) | -0.01    | (0.010) | -0.01    | (0.010) |
| Married         | -0.03*   | (0.011) | -0.03*   | (0.011) | -0.03*   | (0.011) |
| Insurance       | -0.05*** | (0.011) | -0.05*** | (0.011) | -0.05*** | (0.011) |
| Cohort          | 0.03     | (0.021) | 0.03     | (0.021) | 0.03     | (0.021) |
| Wave            | -0.02*   | (0.009) | -0.02*   | (0.009) | -0.02*   | (0.009) |
| White*Education | -0.02    | (0.012) | -0.02    | (0.012) | -0.02    | (0.012) |
| White*Income    | -0.01    | (0.008) | -0.01    | (0.008) | -0.01    | (0.008) |
| White*Wealth    | -0.01    | (0.009) | -0.01    | (0.009) | -0.01    | (0.009) |
| <b>Mistrust</b> |          |         |          |         |          |         |
| Education       | -0.07*** | (0.012) | -0.07*** | (0.012) | -0.07*** | (0.012) |
| Income          | -0.05*** | (0.012) | -0.05*** | (0.012) | -0.05*** | (0.012) |
| Wealth          | -0.11*** | (0.012) | -0.11*** | (0.012) | -0.11*** | (0.012) |
| Mex Am          | 0.02     | (0.014) | 0.02     | (0.014) | 0.02     | (0.014) |
| Age             | -0.09*** | (0.020) | -0.09*** | (0.020) | -0.09*** | (0.020) |
| Female          | -0.05*** | (0.010) | -0.05*** | (0.010) | -0.05*** | (0.010) |
| Married         | -0.05*** | (0.011) | -0.05*** | (0.011) | -0.05*** | (0.011) |
| Insurance       | -0.03**  | (0.011) | -0.03**  | (0.011) | -0.03**  | (0.011) |
| Cohort          | 0.00     | (0.022) | 0.00     | (0.022) | 0.00     | (0.022) |
| Wave            | -0.00    | (0.009) | -0.00    | (0.009) | -0.00    | (0.009) |
| White*Education | -0.02    | (0.010) | -0.02    | (0.010) | -0.02    | (0.010) |
| White*Income    | 0.00     | (0.007) | 0.00     | (0.007) | 0.00     | (0.007) |
| White*Wealth    | -0.01    | (0.010) | -0.01    | (0.010) | -0.01    | (0.010) |
| N               | 26935    |         | 26935    |         | 26935    |         |

Standardized beta coefficients. Covariance, variance, and intercept estimates excluded for brevity.

\* p<0.05; \*\* p<0.01; \*\*\* p<0.001

## Appendix C. Moderated Mediation Models, by Gender

On the one hand, we found no evidence of gender differences in the direction of mediation. On the other hand, several findings of potential gender differences in the magnitude of mediation are suggestive of complex intersectional patterns.

**Appendix Table C1. Moderated Mediation Estimates of Black-White Gaps in Health, by Gender**

### Panel A: Serial Moderated Mediation among Women

|                                        | <u>Self-rated health</u> |        |        | <u>Cumulative Biological Risk</u> |        |     | <u>Functional Limitations</u> |        |       |     |       |      |
|----------------------------------------|--------------------------|--------|--------|-----------------------------------|--------|-----|-------------------------------|--------|-------|-----|-------|------|
|                                        | Beta                     | t stat | SE     | Beta                              | t stat | SE  | Beta                          | t stat | SE    |     |       |      |
| Total effect                           | -0.21                    | ***    | -12.65 | 0.02                              | 0.23   | *** | 12.49                         | 0.02   | 0.14  | *** | 7.81  | 0.02 |
| Indirect effect                        | -0.14                    | ***    | -15.24 | 0.01                              | 0.08   | *** | 10.75                         | 0.01   | 0.13  | *** | 14.66 | 0.01 |
| Proportion Mediated                    | 0.68                     |        |        | 0.33                              |        |     | 0.99                          |        |       |     |       |      |
| Mediators (proportion of total effect) |                          |        |        |                                   |        |     |                               |        |       |     |       |      |
| Education                              | 0.13                     | ***    | 7.49   | 0.02                              | 0.06   | *** | 5.09                          | 0.01   | 0.17  | *** | 6.65  | 0.02 |
| Income                                 | 0.17                     | ***    | 7.79   | 0.02                              | 0.06   | *** | 3.83                          | 0.02   | 0.25  | *** | 6.83  | 0.04 |
| Wealth                                 | 0.17                     | ***    | 8.03   | 0.02                              | 0.12   | *** | 6.54                          | 0.02   | 0.27  | *** | 7.96  | 0.03 |
| Discrim (daily)                        | 0.00                     |        | 1.25   | 0.00                              | 0.00   |     | -0.14                         | 0.00   | 0.01  |     | 1.30  | 0.01 |
| Discrim (2+ att)                       | 0.03                     | **     | 3.28   | 0.01                              | 0.05   | *** | 4.82                          | 0.01   | 0.08  | *** | 4.73  | 0.02 |
| Discrim (Major)                        | 0.01                     |        | 1.50   | 0.01                              | 0.01   |     | 1.25                          | 0.01   | 0.04  | *   | 2.56  | 0.01 |
| Chr. stressors                         | 0.03                     | ***    | 3.40   | 0.01                              | 0.01   | *   | 2.08                          | 0.00   | 0.05  | *** | 3.42  | 0.02 |
| Traumas                                | -0.01                    |        | -1.10  | 0.01                              | 0.00   |     | -1.08                         | 0.00   | -0.01 |     | -1.11 | 0.01 |
| Financial strain                       | 0.04                     | ***    | 4.03   | 0.01                              | 0.01   | **  | 2.65                          | 0.01   | 0.05  | *** | 3.89  | 0.01 |
| Disorder                               | 0.04                     | *      | 2.47   | 0.02                              | 0.02   |     | 0.92                          | 0.02   | 0.05  |     | 1.79  | 0.03 |
| Mistrust                               | 0.05                     | ***    | 3.59   | 0.01                              | 0.00   |     | 0.11                          | 0.01   | 0.05  | *   | 2.01  | 0.02 |

### Panel B: Serial Moderated Mediation among Men

|                                        | <u>Self-rated health</u> |        |        | <u>Cumulative Biological Risk</u> |        |     | <u>Functional Limitations</u> |        |      |     |       |      |
|----------------------------------------|--------------------------|--------|--------|-----------------------------------|--------|-----|-------------------------------|--------|------|-----|-------|------|
|                                        | Beta                     | t stat | SE     | Beta                              | t stat | SE  | Beta                          | t stat | SE   |     |       |      |
| Total effect                           | -0.15                    | ***    | -7.53  | 0.02                              | 0.14   | *** | 6.38                          | 0.02   | 0.12 | *** | 5.46  | 0.02 |
| Indirect effect                        | -0.14                    | ***    | -13.50 | 0.01                              | 0.06   | *** | 8.34                          | 0.01   | 0.13 | *** | 12.39 | 0.01 |
| Proportion Mediated                    | 0.90                     |        |        | 0.45                              |        |     | 1.10                          |        |      |     |       |      |
| Mediators (proportion of total effect) |                          |        |        |                                   |        |     |                               |        |      |     |       |      |
| Education                              | 0.28                     | ***    | 8.67   | 0.03                              | 0.14   | *** | 4.87                          | 0.03   | 0.29 | *** | 7.37  | 0.04 |
| Income                                 | 0.14                     | ***    | 5.49   | 0.02                              | 0.01   |     | 0.69                          | 0.02   | 0.11 | *** | 4.42  | 0.02 |
| Wealth                                 | 0.18                     | ***    | 6.01   | 0.03                              | 0.08   | **  | 3.08                          | 0.03   | 0.27 | *** | 5.79  | 0.05 |
| Discrim (daily)                        | 0.03                     | *      | 2.24   | 0.01                              | 0.01   |     | 0.58                          | 0.01   | 0.04 | *   | 2.28  | 0.02 |
| Discrim (2+ att)                       | 0.06                     | **     | 3.14   | 0.02                              | 0.11   | *** | 4.66                          | 0.02   | 0.09 | *** | 3.34  | 0.03 |
| Discrim (Major)                        | -0.03                    | *      | -2.16  | 0.02                              | 0.02   |     | 0.85                          | 0.02   | 0.03 |     | 1.23  | 0.02 |
| Chr. stressors                         | 0.08                     | ***    | 4.59   | 0.02                              | 0.02   |     | 1.83                          | 0.01   | 0.07 | *** | 3.67  | 0.02 |
| Traumas                                | 0.03                     | *      | 1.98   | 0.02                              | 0.01   |     | 1.58                          | 0.01   | 0.04 | *   | 1.99  | 0.02 |
| Financial strain                       | 0.04                     | **     | 2.98   | 0.01                              | 0.02   | *   | 2.04                          | 0.01   | 0.05 | **  | 2.92  | 0.02 |
| Disorder                               | 0.05                     | *      | 1.98   | 0.03                              | -0.01  |     | -0.25                         | 0.03   | 0.10 | **  | 2.71  | 0.04 |
| Mistrust                               | 0.05                     | *      | 2.44   | 0.02                              | 0.03   |     | 1.09                          | 0.02   | 0.02 |     | 0.57  | 0.03 |

\*<.05; \*\*<.01; \*\*\*<.001

**Appendix Table C2. Moderated Mediation Estimates of Mexican American-White Gaps in Health, by Gender**

**Panel A: Serial Moderated Mediation among Women**

|                 | <u>Self-rated health</u> |        |       | <u>Cumulative Biological Risk</u> |        |     | <u>Functional Limitations</u> |        |      |     |      |      |
|-----------------|--------------------------|--------|-------|-----------------------------------|--------|-----|-------------------------------|--------|------|-----|------|------|
|                 | Beta                     | t stat | SE    | Beta                              | t stat | SE  | Beta                          | t stat | SE   |     |      |      |
| Total effect    | -0.12                    | ***    | -6.26 | 0.02                              | 0.08   | *** | 3.53                          | 0.02   | 0.05 | *   | 2.49 | 0.02 |
| Indirect effect | -0.09                    | ***    | -9.42 | 0.01                              | 0.05   | *** | 8.15                          | 0.01   | 0.08 | *** | 8.69 | 0.01 |

\*<.05; \*\*<.01; \*\*\*<.001

| Proportion Mediated                    | 0.75  |     |       | 0.68 |       |     | 1.59  |      |       |     |       |      |
|----------------------------------------|-------|-----|-------|------|-------|-----|-------|------|-------|-----|-------|------|
| Mediators (proportion of total effect) |       |     |       |      |       |     |       |      |       |     |       |      |
| Education                              | 0.33  | *** | 7.97  | 0.04 | 0.33  | *** | 5.84  | 0.06 | 0.60  | *** | 6.64  | 0.09 |
| Income                                 | 0.19  | *** | 5.08  | 0.04 | 0.13  | *** | 3.56  | 0.04 | 0.44  | *** | 4.83  | 0.09 |
| Wealth                                 | 0.09  | *** | 3.48  | 0.02 | 0.10  | **  | 3.28  | 0.03 | 0.22  | *** | 3.50  | 0.06 |
| Discrim (daily)                        | 0.00  |     | 0.48  | 0.00 | 0.00  |     | -0.54 | 0.00 | 0.01  |     | 0.62  | 0.01 |
| Discrim (2+ att)                       | 0.02  |     | 1.60  | 0.01 | 0.04  |     | 1.61  | 0.03 | 0.06  |     | 1.64  | 0.04 |
| Discrim (Major)                        | 0.00  |     | 0.82  | 0.00 | 0.01  |     | 0.97  | 0.01 | 0.01  |     | 0.97  | 0.01 |
| Chr. stressors                         | 0.05  |     | 1.95  | 0.03 | 0.02  |     | 1.51  | 0.02 | 0.12  |     | 1.84  | 0.06 |
| Traumas                                | -0.01 |     | -0.58 | 0.01 | -0.01 |     | -0.58 | 0.01 | -0.02 |     | -0.58 | 0.03 |
| Financial strain                       | 0.03  |     | 1.61  | 0.02 | 0.02  |     | 1.46  | 0.02 | 0.05  |     | 1.59  | 0.03 |
| Disorder                               | 0.02  |     | 1.64  | 0.01 | 0.02  |     | 0.73  | 0.02 | 0.06  |     | 1.72  | 0.04 |
| Mistrust                               | 0.02  |     | 1.57  | 0.01 | 0.00  |     | 0.55  | 0.01 | 0.04  |     | 1.50  | 0.02 |

**Panel B: Serial Moderated Mediation among Men**

|                                        | <u>Self-rated health</u> |     |        |      | <u>Cumulative Biological Risk</u> |     |        |      | <u>Functional Limitations</u> |     |        |      |
|----------------------------------------|--------------------------|-----|--------|------|-----------------------------------|-----|--------|------|-------------------------------|-----|--------|------|
|                                        | Beta                     |     | t stat | SE   | Beta                              |     | t stat | SE   | Beta                          |     | t stat | SE   |
| Total effect                           | -0.14                    | *** | -6.87  | 0.02 | 0.10                              | *** | 4.08   | 0.02 | 0.11                          | *** | 4.99   | 0.02 |
| Indirect effect                        | -0.09                    | *** | -7.83  | 0.01 | 0.05                              | *** | 7.00   | 0.01 | 0.08                          | *** | 7.57   | 0.01 |
| Proportion Mediated                    | 0.59                     |     |        |      | 0.47                              |     |        |      | 0.68                          |     |        |      |
| Mediators (proportion of total effect) |                          |     |        |      |                                   |     |        |      |                               |     |        |      |
| Education                              | 0.29                     | *** | 7.13   | 0.04 | 0.23                              | *** | 5.23   | 0.04 | 0.30                          | *** | 6.57   | 0.05 |
| Income                                 | 0.10                     | *** | 3.74   | 0.03 | 0.02                              |     | 1.20   | 0.02 | 0.09                          | *** | 3.42   | 0.03 |
| Wealth                                 | 0.08                     | *** | 3.63   | 0.02 | 0.07                              | **  | 3.06   | 0.02 | 0.12                          | *** | 3.69   | 0.03 |
| Discrim (daily)                        | 0.00                     |     | -0.60  | 0.01 | 0.00                              |     | -0.53  | 0.00 | -0.01                         |     | -0.61  | 0.01 |
| Discrim (2+ att)                       | 0.03                     | *   | 2.43   | 0.01 | 0.07                              | **  | 2.84   | 0.03 | 0.05                          | *   | 2.64   | 0.02 |
| Discrim (Major)                        | 0.00                     |     | 0.15   | 0.00 | 0.00                              |     | -0.14  | 0.00 | 0.00                          |     | -0.14  | 0.00 |
| Chr. stressors                         | 0.03                     |     | 1.13   | 0.02 | 0.01                              |     | 0.96   | 0.01 | 0.02                          |     | 1.12   | 0.02 |
| Traumas                                | 0.04                     |     | 1.91   | 0.02 | 0.03                              |     | 1.66   | 0.02 | 0.05                          |     | 1.92   | 0.02 |
| Financial strain                       | 0.02                     |     | 1.56   | 0.01 | 0.02                              |     | 1.54   | 0.01 | 0.03                          |     | 1.61   | 0.02 |
| Disorder                               | 0.01                     |     | 1.51   | 0.01 | 0.01                              |     | 0.82   | 0.01 | 0.02                          |     | 1.73   | 0.01 |
| Mistrust                               | 0.00                     |     | 0.35   | 0.01 | 0.00                              |     | 0.31   | 0.00 | 0.00                          |     | -0.04  | 0.00 |
